# Supplementary material for: Reduction midpoint potential of a paradigm light–oxygen–voltage receptor and its modulation by methionine residues
Source: Royal Society of Chemistry journal article supplement (doi:10.1039/d4cb00056k), 2024-01-01
Supplement: d4cb00056k1.pdf [file d4cb00056k1.pdf]

# Reduction Midpoint Potential of a Paradigm Light-Oxygen-Voltage Receptor and its Modulation by Methionine Residues

Andrés García de Fuentes & Andreas Möglich

## Supplementary Material

Supplementary Figure 1

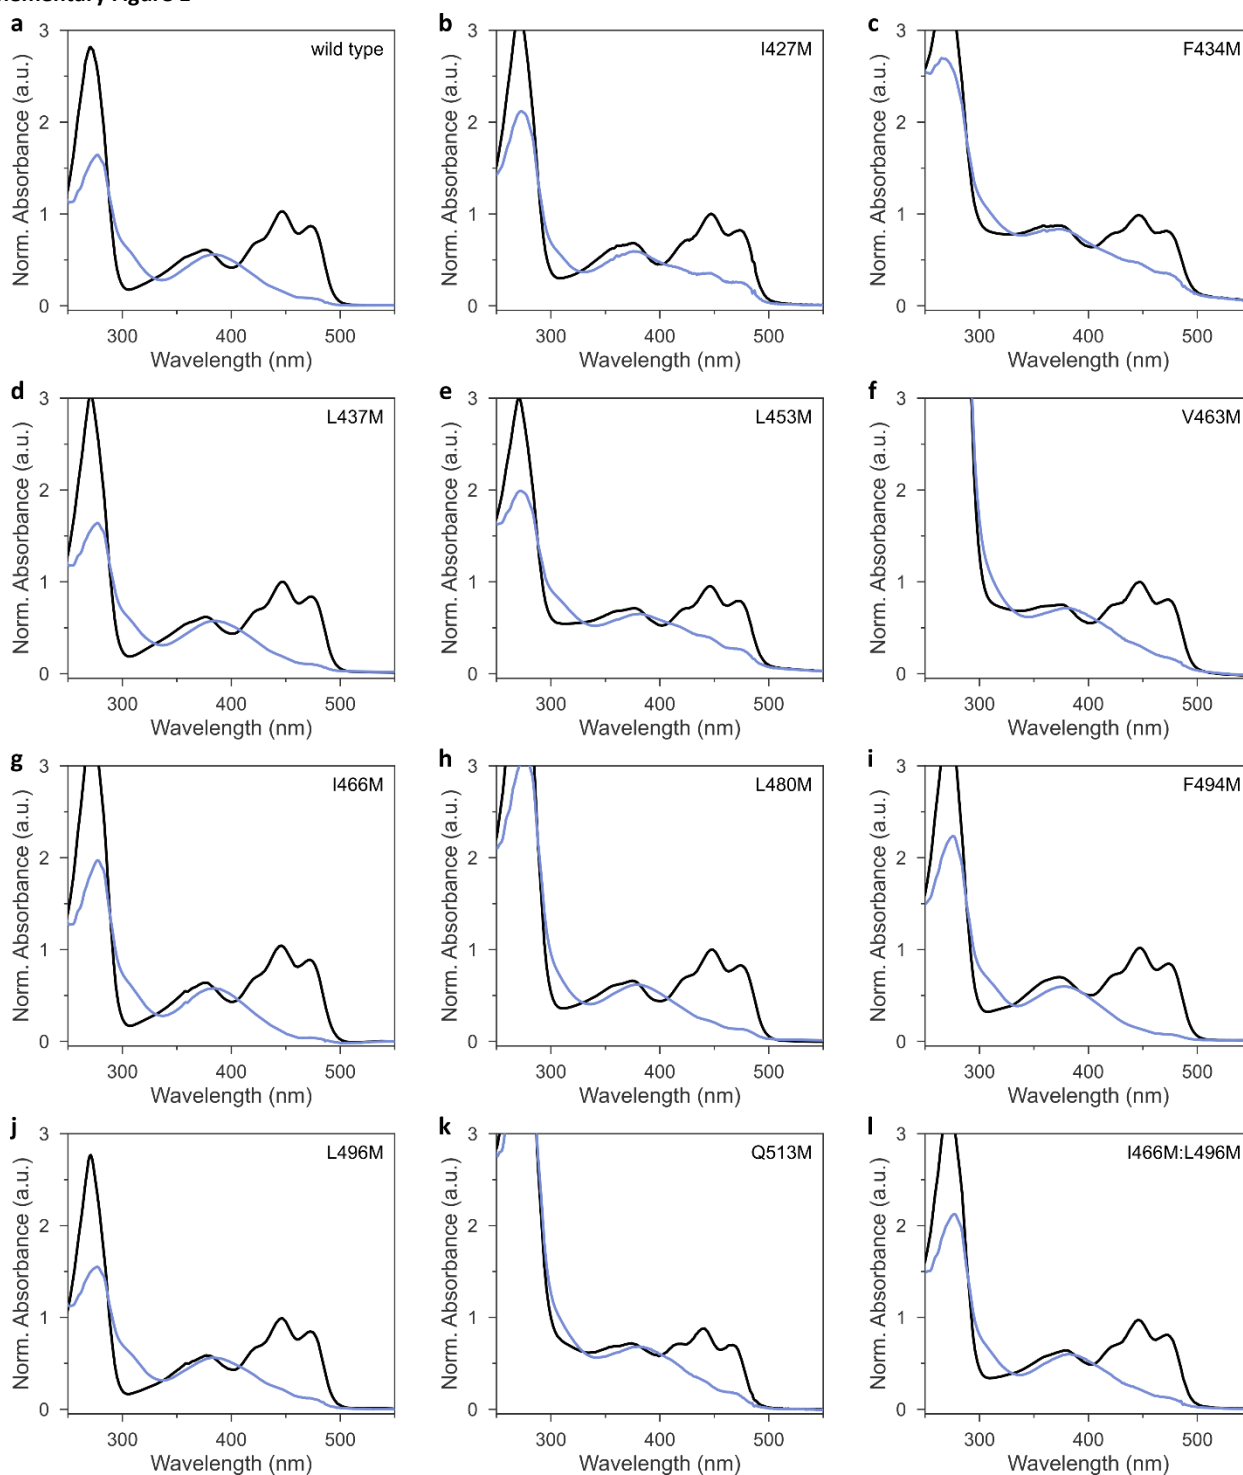

UV-vis absorbance spectra of the AsLOV2 variants in their dark-adapted (black lines) and light-adapted states (blue). **a**, AsLOV2 wild type. **b**, AsLOV2 I427M. **c**, AsLOV2 F434M. **d**, AsLOV2 L437M. **e**, AsLOV2 L453M. **f**, AsLOV2 V463M. **g**, AsLOV2 I466M. **h**, AsLOV2 L480M. **i**, AsLOV2 F494M. **j**, AsLOV2 L496M. **k**, AsLOV2 Q513M. **l**, AsLOV2 I466M:L496M.

Supplementary Figure 2

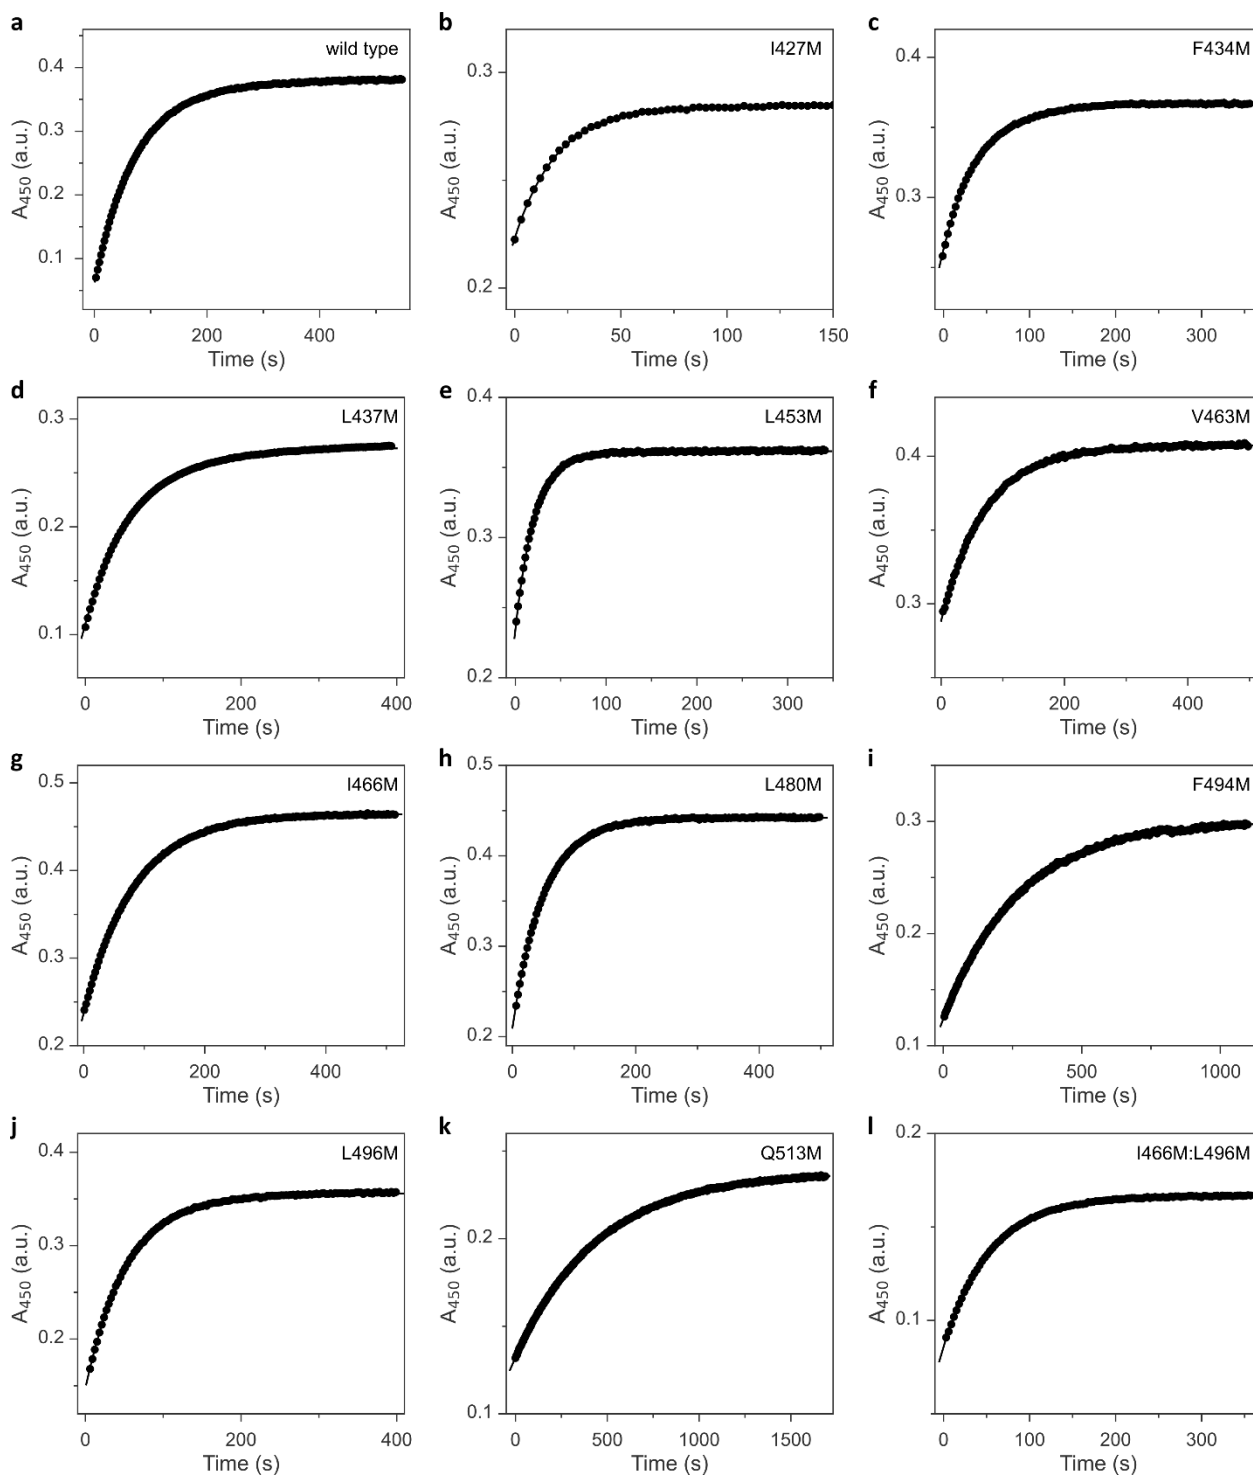

Dark-recovery kinetics of the AsLOV2 variants monitored by absorbance measurements at 450 nm. **a**, AsLOV2 wild type. **b**, AsLOV2 I427M. **c**, AsLOV2 F434M. **d**, AsLOV2 L437M. **e**, AsLOV2 L453M. **f**, AsLOV2 V463M. **g**, AsLOV2 I466M. **h**, AsLOV2 L480M. **i**, AsLOV2 F494M. **j**, AsLOV2 L496M. **k**, AsLOV2 Q513M. **l**, AsLOV2 I466M:L496M.

## Supplementary Figure 3

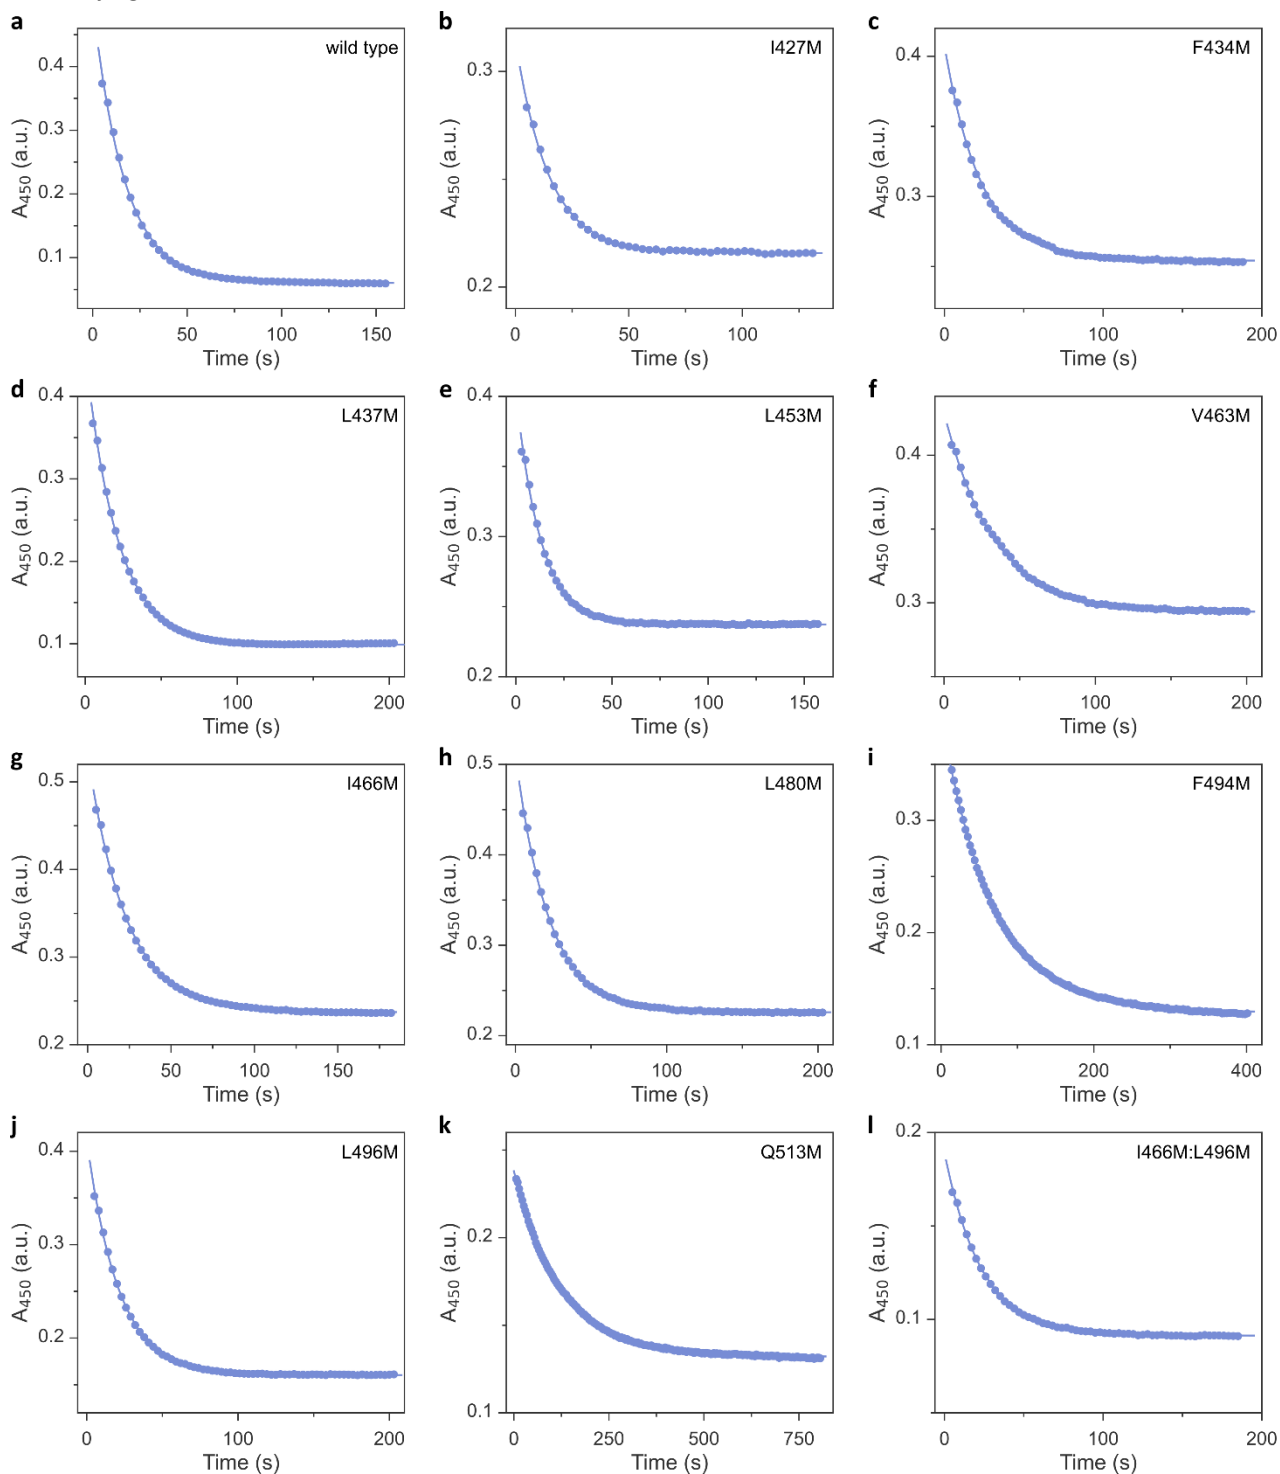

Photoactivation kinetics of the AsLOV2 variants monitored by absorbance measurements at 450 nm. A set illumination geometry and intensity ( $3 \text{ mW cm}^{-2}$ ) was used in all measurements. **a**, AsLOV2 wild type. **b**, AsLOV2 I427M. **c**, AsLOV2 F434M. **d**, AsLOV2 L437M. **e**, AsLOV2 L453M. **f**, AsLOV2 V463M. **g**, AsLOV2 I466M. **h**, AsLOV2 L480M. **i**, AsLOV2 F494M. **j**, AsLOV2 L496M. **k**, AsLOV2 Q513M. **l**, AsLOV2 I466M:L496M.

Supplementary Figure 4

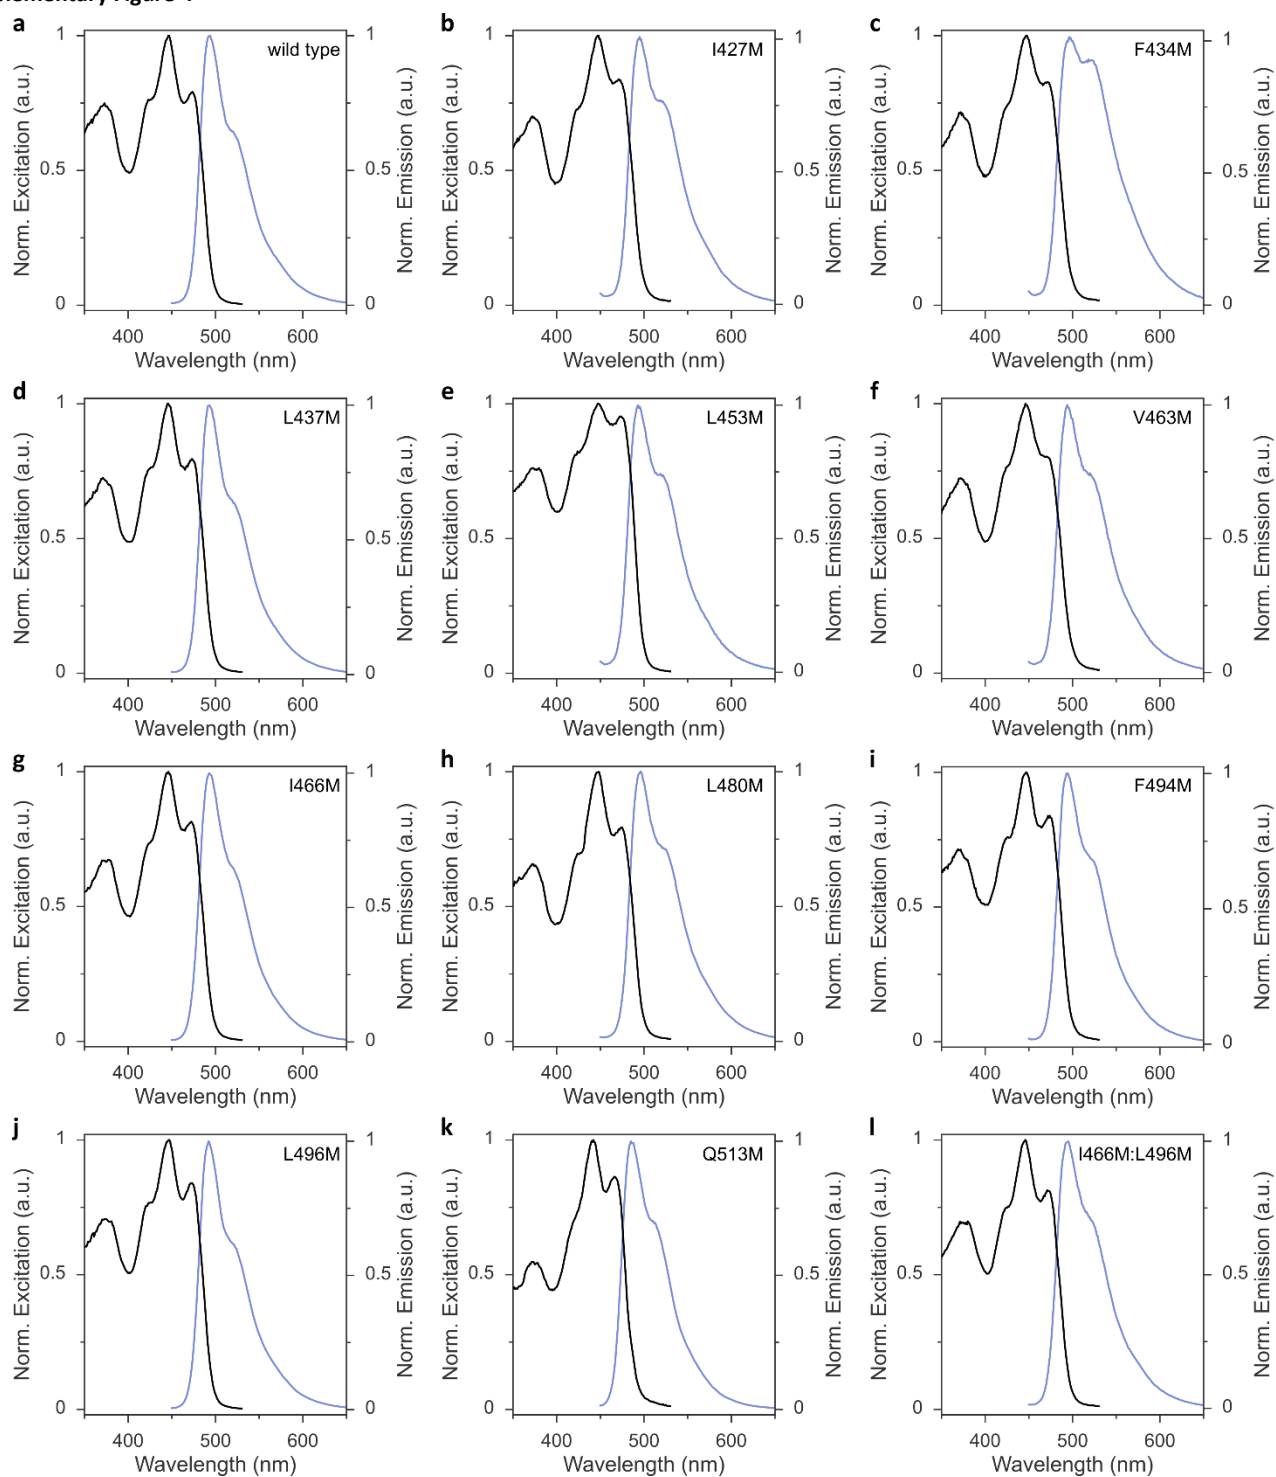

Fluorescence excitation (black lines) and emission spectra (blue) of the AsLOV2 variants. **a**, AsLOV2 wild type. **b**, AsLOV2 I427M. **c**, AsLOV2 F434M. **d**, AsLOV2 L437M. **e**, AsLOV2 L453M. **f**, AsLOV2 V463M. **g**, AsLOV2 I466M. **h**, AsLOV2 L480M. **i**, AsLOV2 F494M. **j**, AsLOV2 L496M. **k**, AsLOV2 Q513M. **l**, AsLOV2 I466M:L496M.

## Supplementary Figure 5

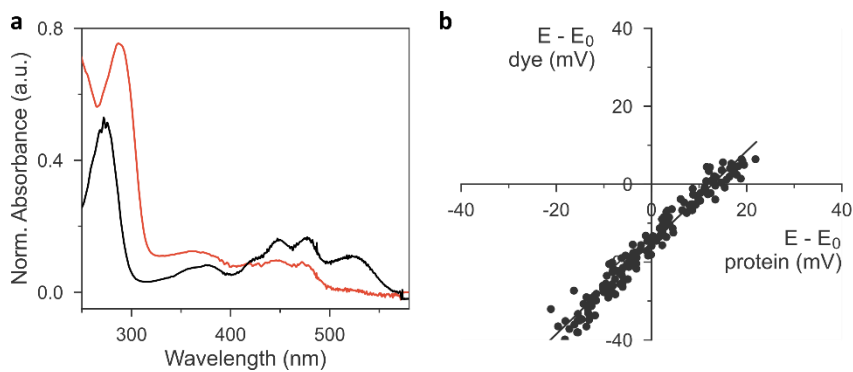

Determination of the flavin reduction midpoint potentials in AsLOV2 wild type by the xanthine-oxidase (XO) method. **a**, Absorbance spectra at the start of the XO reduction kinetics (black lines) and after 5 hours (red). **b**, The correlation of the oxidized and reduced fractions of the redox indicator phenosafranine and AsLOV2 according to the Nernst equation allows the determination of the flavin reduction midpoint potential in AsLOV2. The y axis denotes  $E - E_{0,r}$  for the dye, and the x axis plots the corresponding values  $E - E_0$  for the LOV protein.

## Supplementary Figure 6

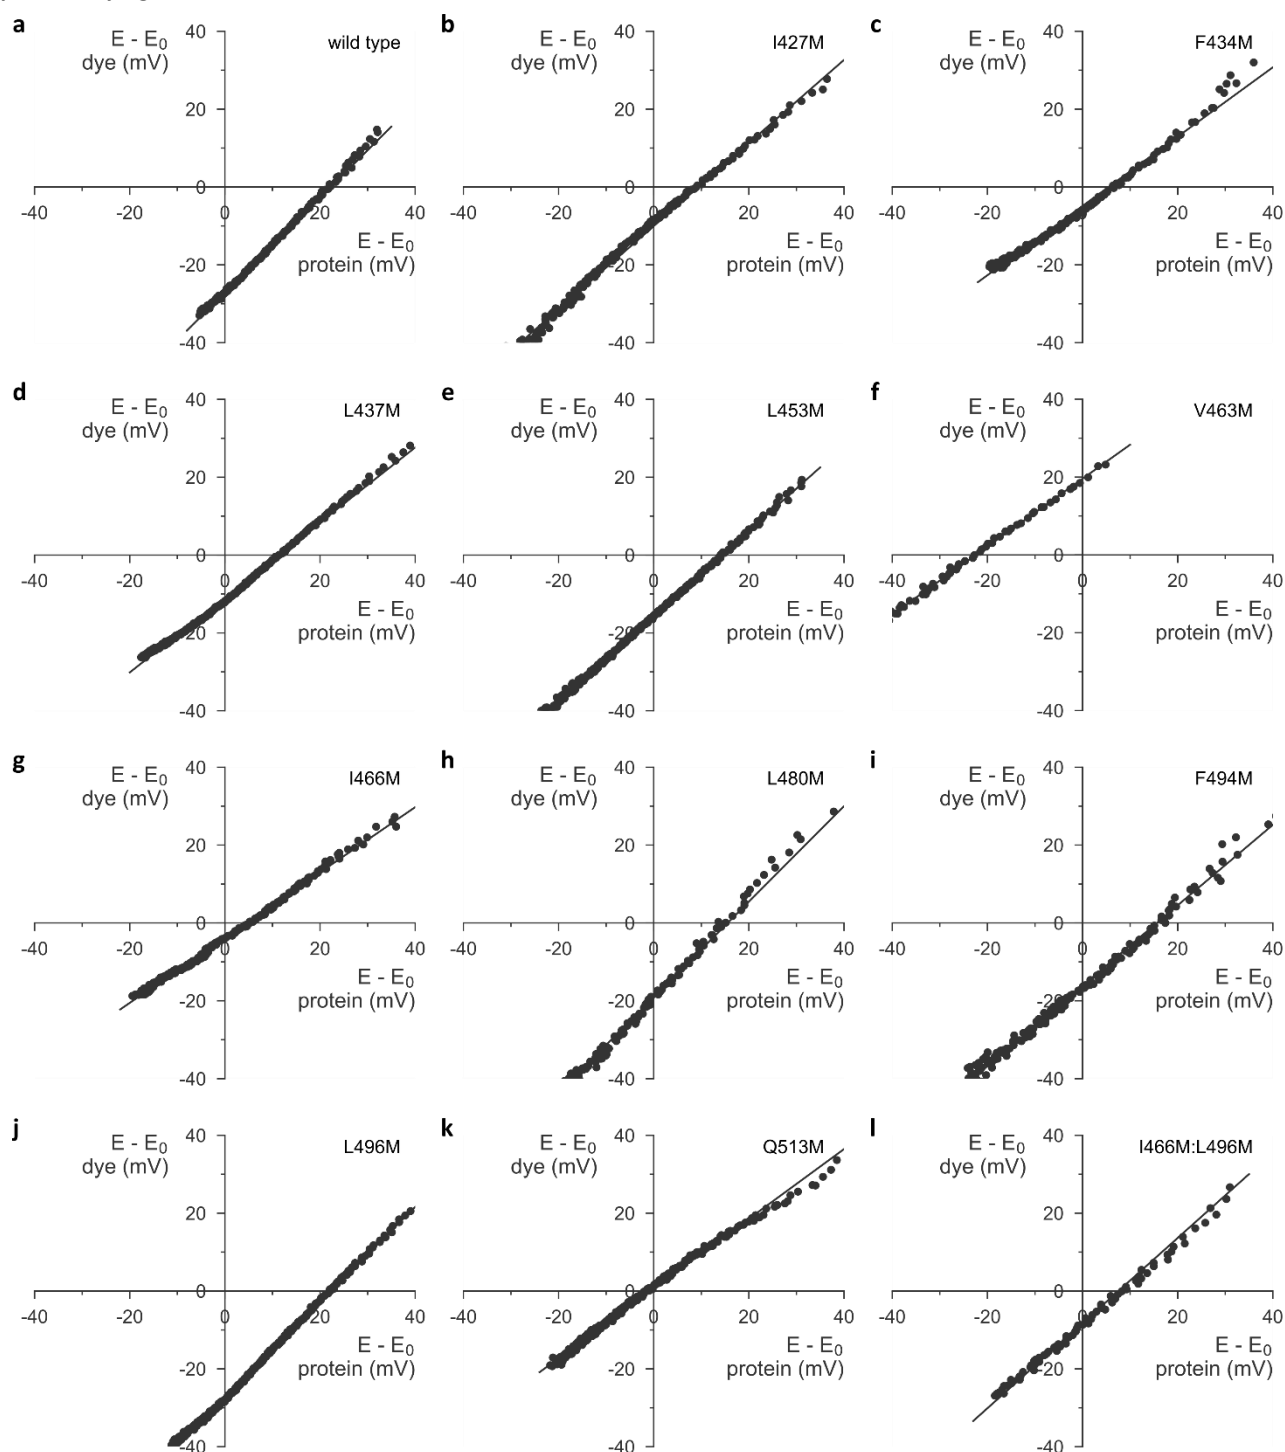

Determination of the flavin reduction midpoint potentials in the AsLOV2 variants. The y axis denotes  $E - E_{0,r}$  for the dye, and the x axis plots the corresponding values  $E - E_0$  for the LOV protein. **a**, AsLOV2 wild type. **b**, AsLOV2 I427M. **c**, AsLOV2 F434M. **d**, AsLOV2 L437M. **e**, AsLOV2 L453M. **f**, AsLOV2 V463M. **g**, AsLOV2 I466M. **h**, AsLOV2 L480M. **i**, AsLOV2 F494M. **j**, AsLOV2 L496M. **k**, AsLOV2 Q513M. **l**, AsLOV2 I466M:L496M.

## Supplementary Figure 7

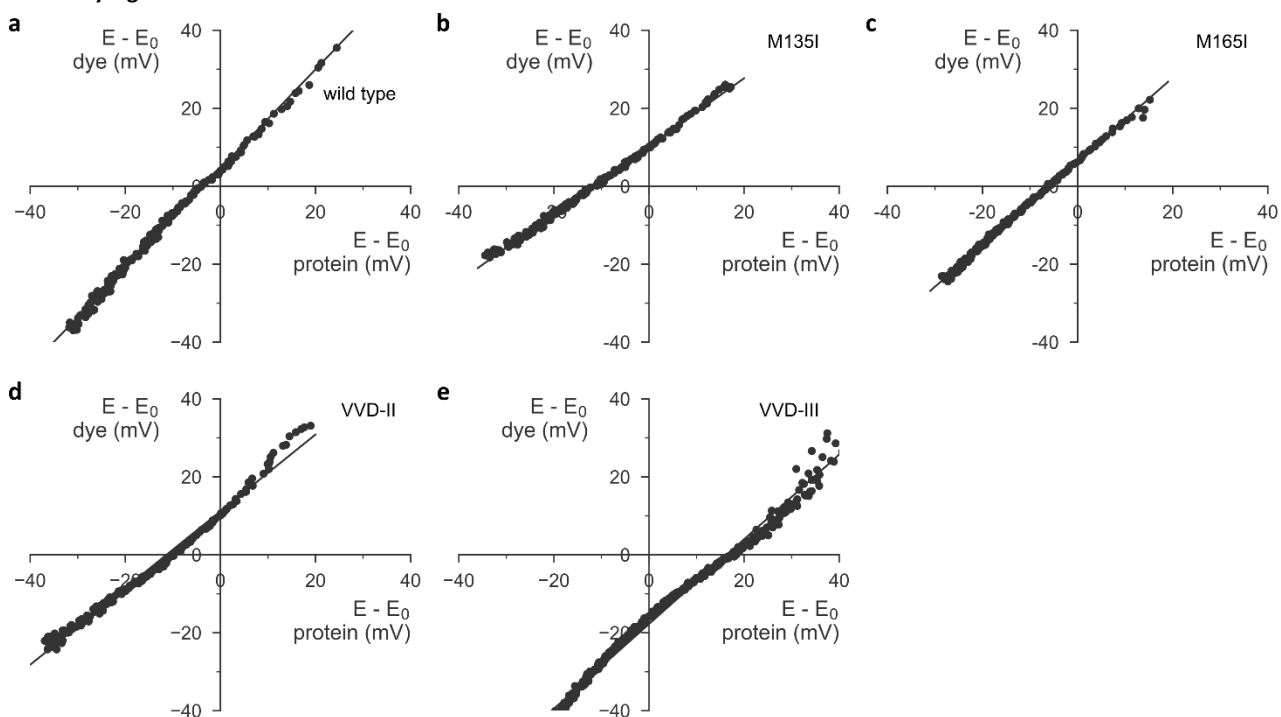

Determination of the flavin reduction midpoint potentials in the indicated *NcVVD* variants. The y axis denotes  $E - E_{0,r}$  for the dye, and the x axis plots the corresponding values  $E - E_0$  for the LOV protein. **a**, *NcVVD* wild type. **b**, *NcVVD* M135I. **c**, *NcVVD* M165I. **d**, *NcVVD*-II (M135I:M165I). **e**, *NcVVD*-III (C108A:M135I:M165I).

## Supplementary Figure 8

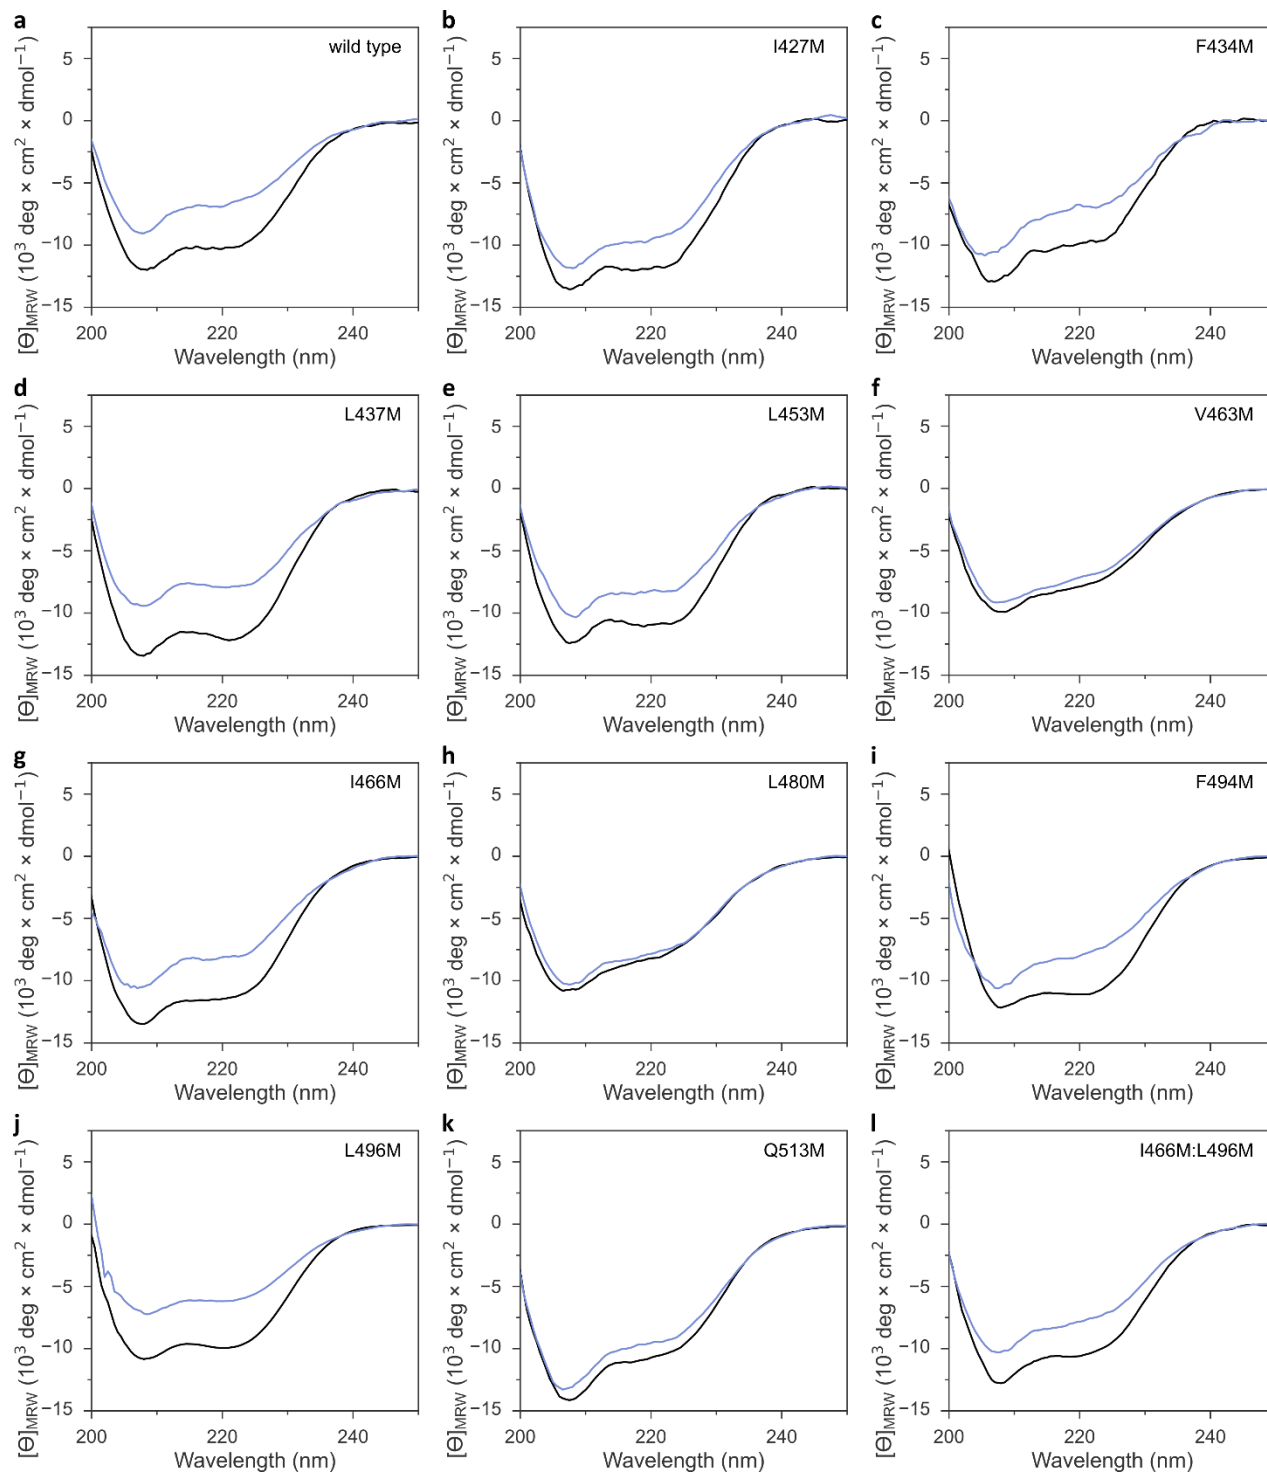

Far-UV circular dichroism spectra of the AsLOV2 variants in their dark-adapted (black lines) and light-adapted states (blue). **a**, AsLOV2 wild type. **b**, AsLOV2 I427M. **c**, AsLOV2 F434M. **d**, AsLOV2 L437M. **e**, AsLOV2 L453M. **f**, AsLOV2 V463M. **g**, AsLOV2 I466M. **h**, AsLOV2 L480M. **i**, AsLOV2 F494M. **j**, AsLOV2 L496M. **k**, AsLOV2 Q513M. **l**, AsLOV2 I466M:L496M.
